# Supplementary material for: Alterations in the mammary gland and tumor microenvironment of formerly obese mice
Source: Springer Nature journal article supplement (doi:10.1186/s12885-023-11688-3), 2023-12-01

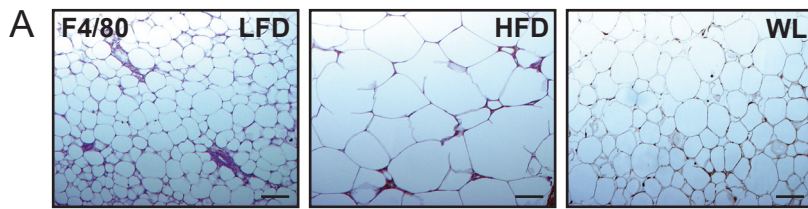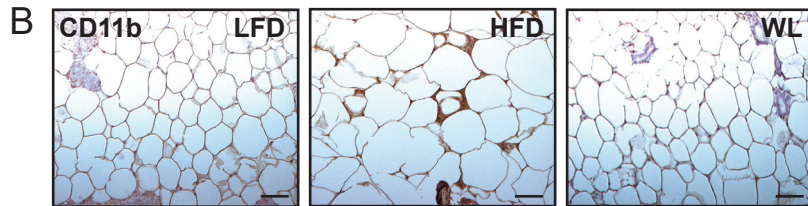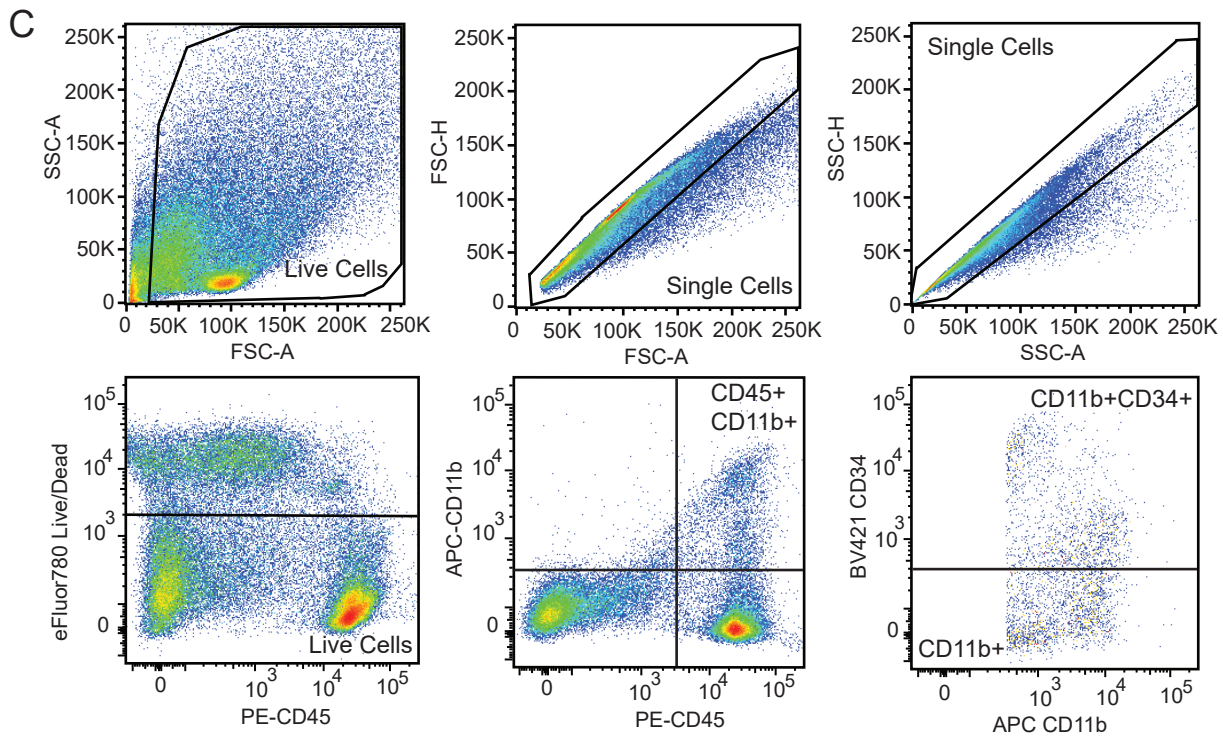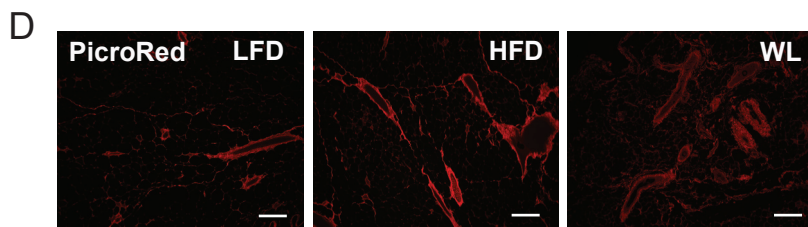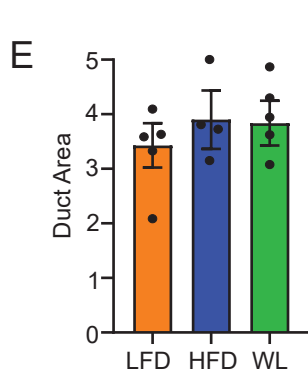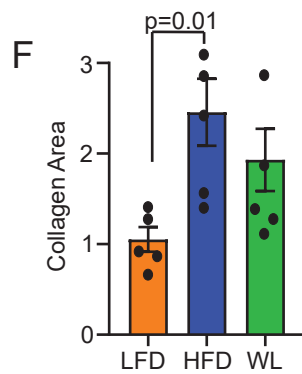

Supplement: MOESM2 [file 26480616]
